# Supplementary material for: Effect of planetary boundary layer evolution on new particle formation events over Cyprus
Source: Copernicus journal article supplement (doi:10.5194/ar-2024-31), 2024-10-24
Supplement: Supplementary file 1 [file ar-2024-31-supplement.pdf]

# Supplementary Information

for

## Effect of planetary boundary layer evolution on new particle formation events over Cyprus

Neha Deot<sup>1</sup>, Vijay P. Kanawade<sup>1,2\*</sup>, Alkistis Papetta<sup>1</sup>, Rima Baalbaki<sup>3,1</sup>, Michael Pikridas<sup>1</sup>, Franco Marengo<sup>1</sup>, Markku Kulmala<sup>3</sup>, Jean Sciare<sup>1</sup>, Katrianne Lehtipalo<sup>2,3</sup>, Tuija Jokinen<sup>1\*</sup>

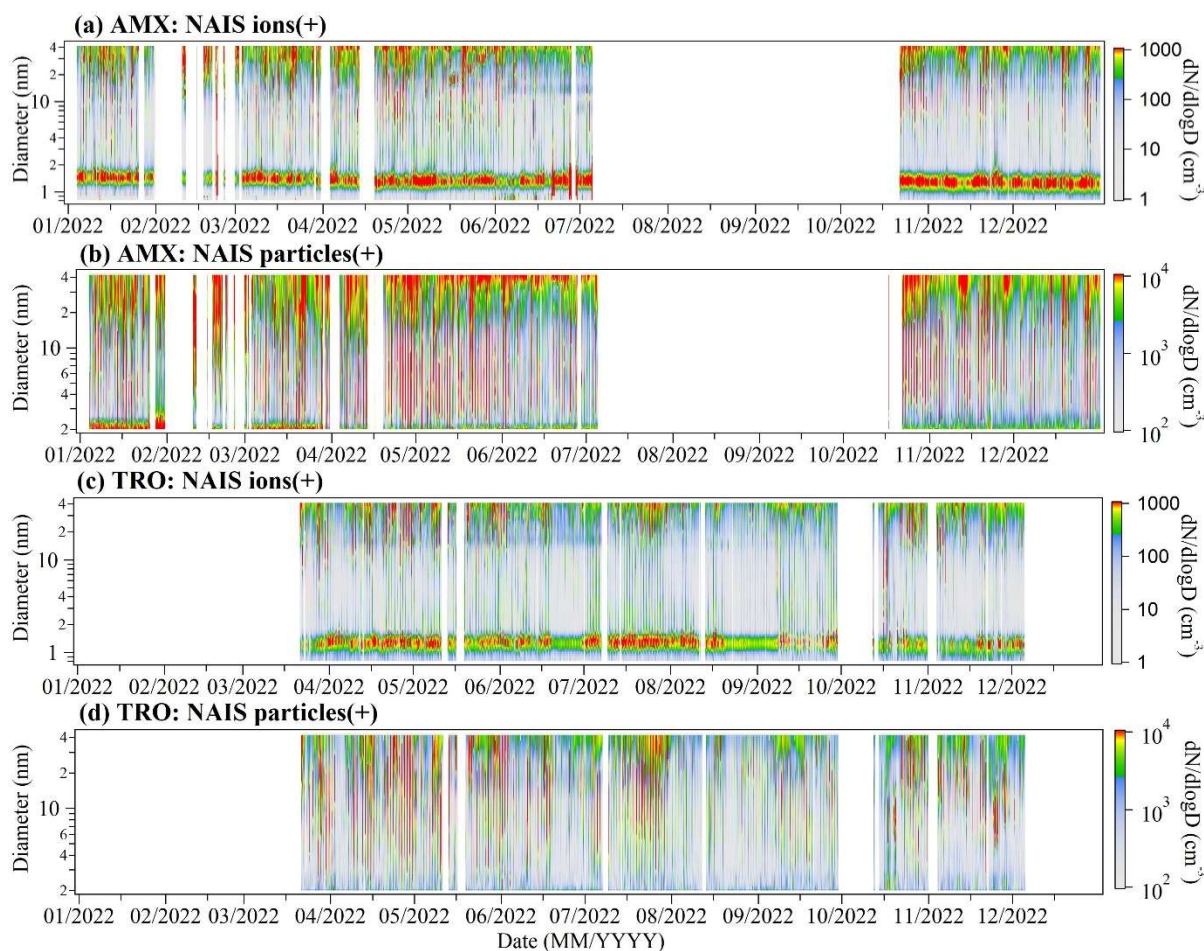

**Figure S1.** Time-evolution of positive polarity ion and particle number size distributions at AMX (a,b) and TRO (c,d) during the study period. The white spaces indicate data unavailability.

15 **Table S1.** The monthly number of NPF events, non-events, unclear days, and nodata days at  
 16 AMX and TRO, and concurrent NPF events at both AMX and TRO sites.

| Month | AMX        |           |         |        | TRO        |           |         |        | Concurrent |
|-------|------------|-----------|---------|--------|------------|-----------|---------|--------|------------|
|       | NPF        | non-event | Unclear | nodata | NPF        | non-event | Unclear | nodata | NPF        |
| Jan   | <b>12</b>  | 6         | 6       | 7      | <b>0</b>   | 0         | 0       | 31     | <b>0</b>   |
| Feb   | <b>0</b>   | 0         | 3       | 25     | <b>0</b>   | 0         | 0       | 28     | <b>0</b>   |
| Mar   | <b>15</b>  | 3         | 10      | 3      | <b>4</b>   | 0         | 5       | 22     | <b>3</b>   |
| Apr   | <b>23</b>  | 1         | 2       | 4      | <b>22</b>  | 7         | 1       | 0      | <b>19</b>  |
| May   | <b>23</b>  | 4         | 4       | 0      | <b>20</b>  | 2         | 3       | 6      | <b>17</b>  |
| Jun   | <b>11</b>  | 11        | 6       | 2      | <b>11</b>  | 11        | 8       | 0      | <b>7</b>   |
| Jul   | <b>3</b>   | 1         | 0       | 27     | <b>22</b>  | 2         | 2       | 5      | <b>2</b>   |
| Aug   | <b>0</b>   | 0         | 0       | 31     | <b>5</b>   | 10        | 14      | 2      | <b>0</b>   |
| Sep   | <b>0</b>   | 0         | 0       | 30     | <b>16</b>  | 1         | 12      | 1      | <b>0</b>   |
| Oct   | <b>10</b>  | 0         | 0       | 21     | <b>10</b>  | 1         | 5       | 15     | <b>10</b>  |
| Nov   | <b>18</b>  | 5         | 6       | 1      | <b>9</b>   | 3         | 14      | 4      | <b>9</b>   |
| Dec   | <b>14</b>  | 12        | 5       | 0      | <b>2</b>   | 2         | 0       | 27     | <b>2</b>   |
| Total | <b>129</b> | 43        | 42      | 151    | <b>121</b> | 39        | 64      | 141    | <b>69</b>  |

17

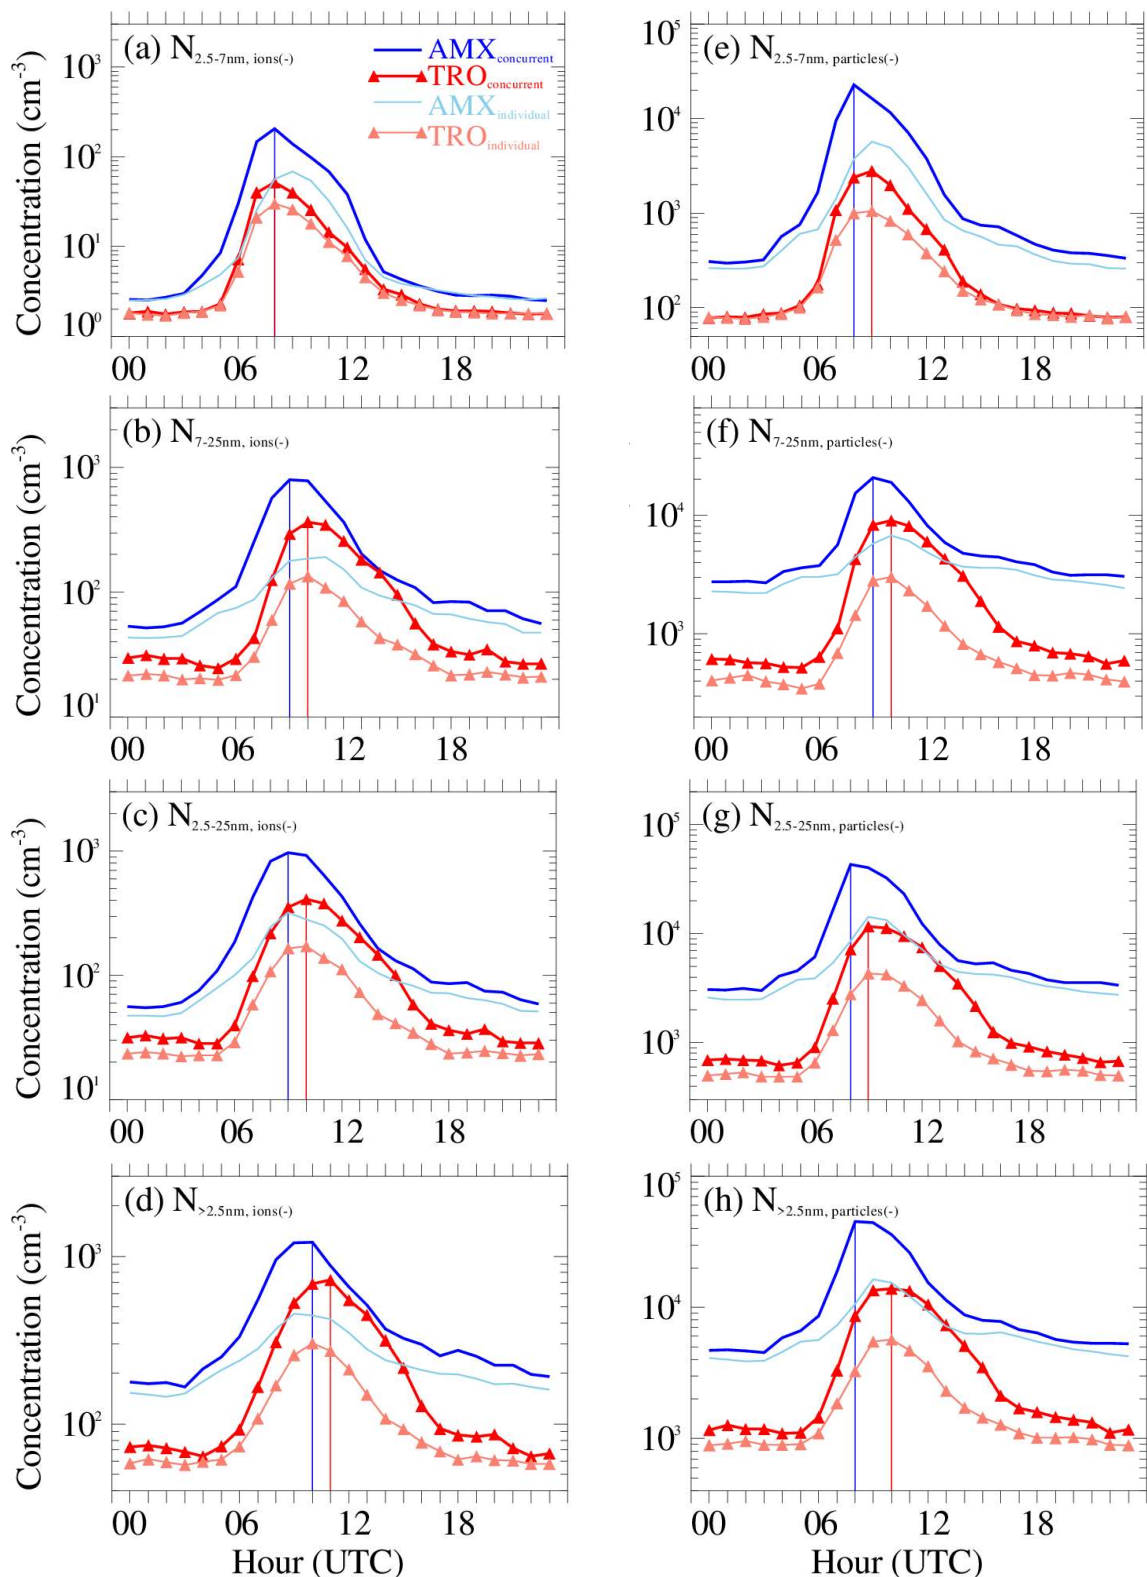

18 **Figure S2.** Median diurnal variation of negative polarity ion (a-d) and particle (e-h) size-  
 19 segregated (2.5-7 nm, 7-25 nm, 2.5-25 nm, and >2.5 nm) number concentrations observed on  
 20 concurrent NPF events at AMX (dark blue thick line) and TRO (dark red thick line). The light  
 21 blue and light red coloured thin lines are for NPF events observed individually at AMX and  
 22 TRO, respectively. The blue and red vertical lines indicate the times at which the peak  
 23 concentrations for concurrent NPF events are observed at AMX and TRO, respectively.

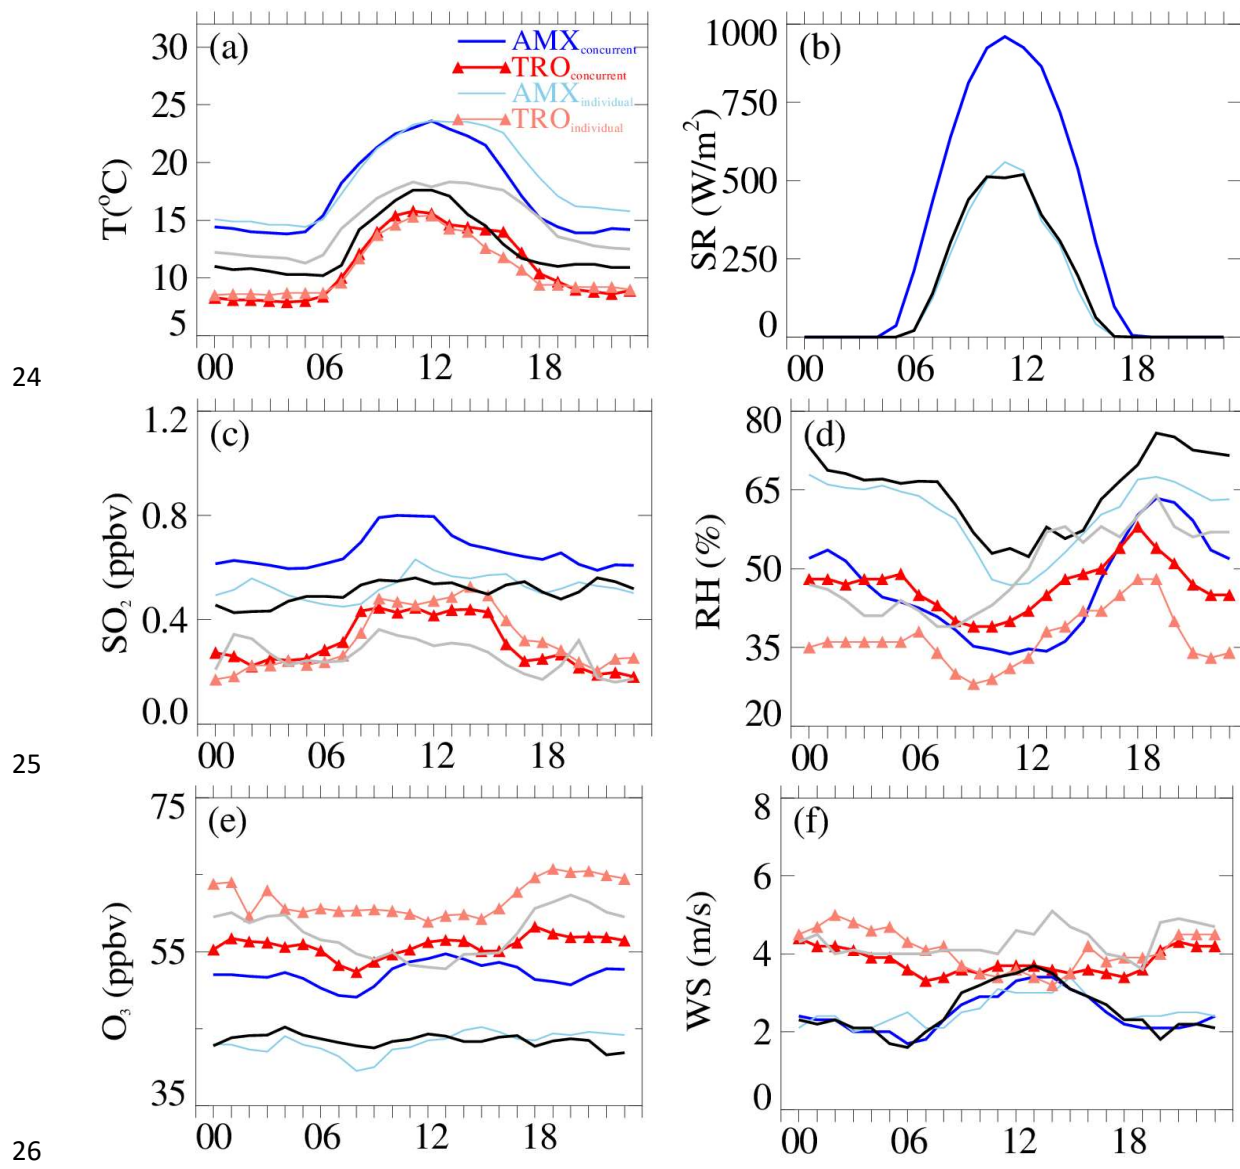

27 **Figure S3.** Median diurnal variation of in-situ measured meteorological parameters, such as  
 28 (a) air temperature (T), (b) solar radiation (SR), (c) sulfur dioxide (SO<sub>2</sub>), (d) relative humidity  
 29 (RH), (e) ozone (O<sub>3</sub>), and (f) wind speed (WS) for the observed concurrent NPF events at  
 30 AMX (blue thick line) and TRO (red thick line). The light blue and light red coloured thin lines  
 31 are for NPF events observed individually at AMX and TRO, respectively. Black and grey lines  
 32 are for non-events observed at AMX and TRO, respectively.

33

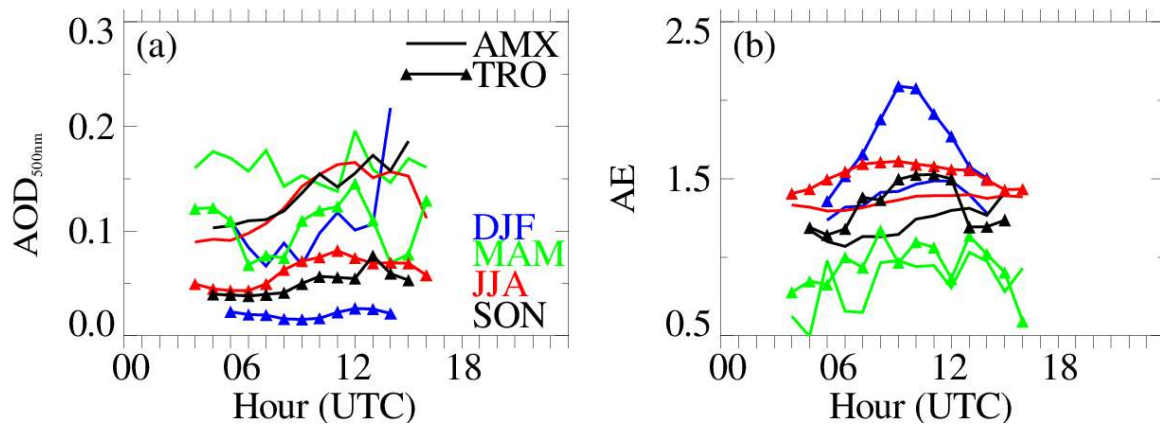

34

35 **Figure S4.** Median seasonal diurnal variation of AERONET derived (a) aerosol optical depth  
 36 (AOD) and (b) Ångström exponent (AE) for winter (blue), spring (green), summer (red), and  
 37 fall (black) based on the entire study period viz., from 1 January to 31 December 2022 at AMX  
 38 (solid line) and TRO (line connected by filled triangles).

39

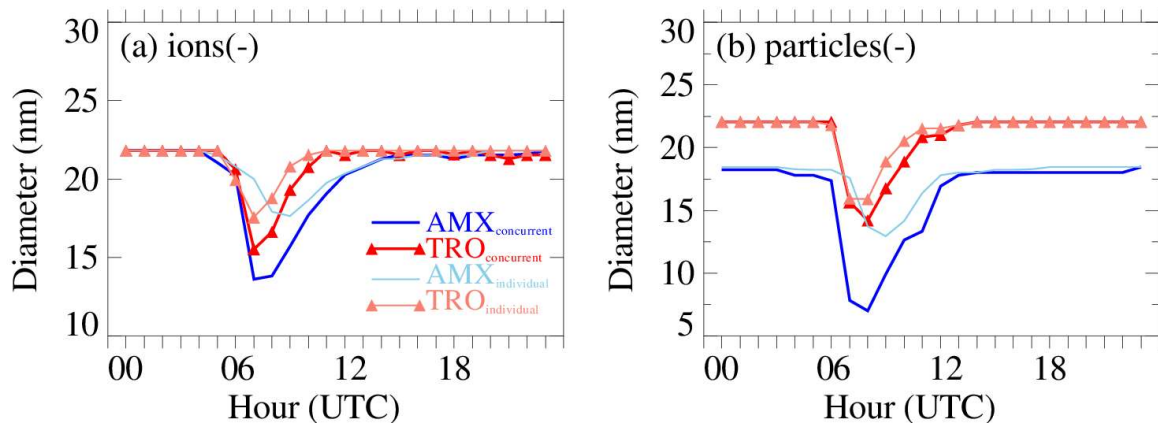

40

41 **Figure S5.** Median diurnal variation of negative polarity (a) ion and (b) particle mode diameter  
 42 for the observed concurrent NPF events at AMX (blue thick line) and TRO (red thick line).  
 43 The light blue and light red coloured thin lines are for NPF events observed individually at  
 44 AMX and TRO, respectively.

45

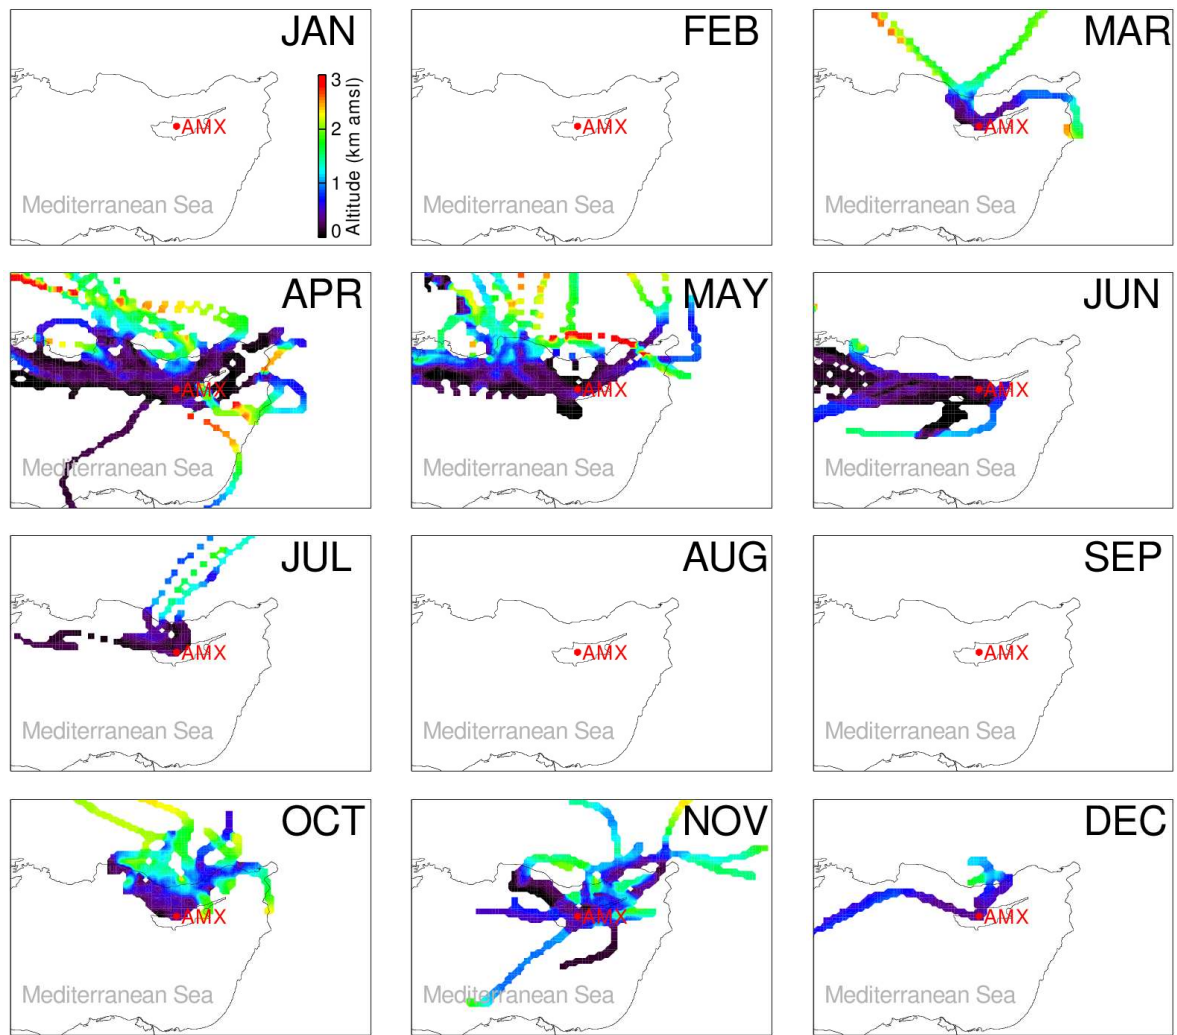

46 **Figure S6.** Monthly averaged two-day air mass backward trajectories as a function of altitude  
 47 for observed concurrent NPF events at the AMX site.

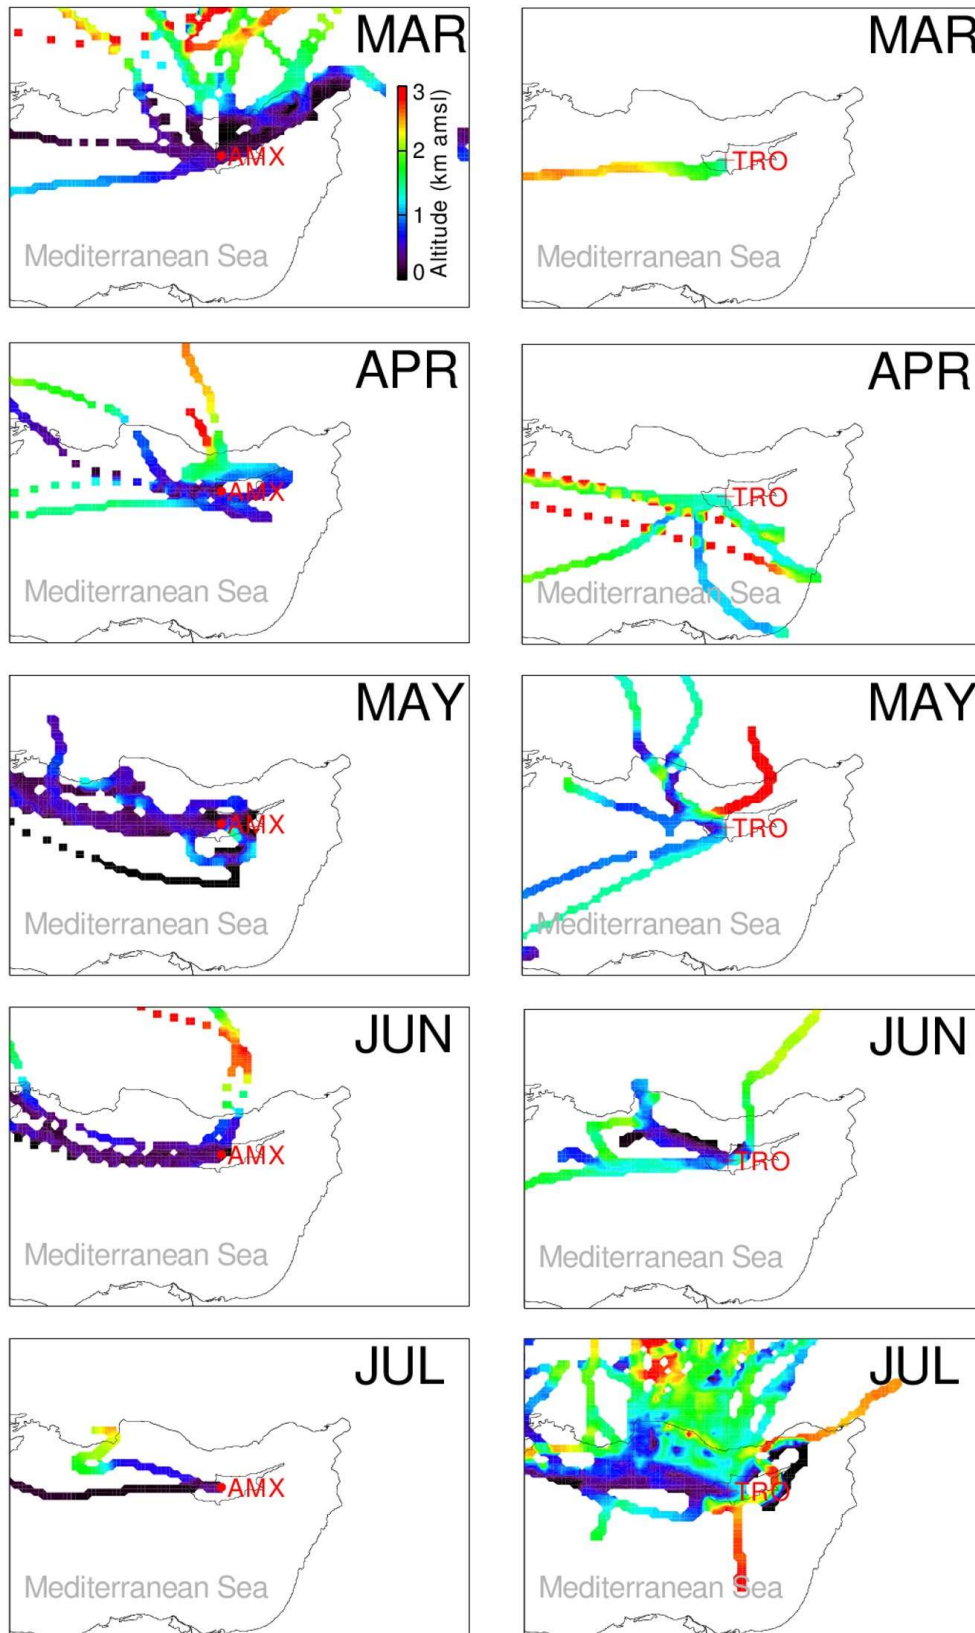

48

49 **Figure S7.** Same as Fig. S6, but for observed individual NPF events at AMX (left column) and  
 50 TRO (right column). There were no measurements at AMX during August and September and  
 51 at TRO during January, February, and December. All the observed NPF events during October  
 52 and November concurrently occurred at both sites.
